# Supplementary material
Source: publisher site journal article supplement (https://www.dovepress.com/article/576654)

Table S1: Baseline characteristics and clinical outcomes of critically ill COPD patients with and without the ROX index

| **Characteristic** | **Without ROX index**  N = 2,312 | **With ROX index**  N = 2,176 | **P-value** |
| --- | --- | --- | --- |
| Gender |  |  | <0.001 |
| Male | 1,089 (47.10%) | 1,250 (57.44%) |  |
| Female | 1223 (52.90%) | 926 (42.56%) |  |
| Age | 72.65 (64.37, 81.54) | 71.55 (63.58, 78.91) | <0.001 |
| BMI | 27.44 (23.14, 33.00) | 28.77 (24.19, 34.40) | 0.002 |
| Race |  |  | <0.001 |
| White | 1,745 (75.48%) | 1,511 (69.44%) |  |
| Black | 225 (9.73%) | 178 (8.18%) |  |
| Other | 342 (14.79%) | 487 (22.38%) |  |
| Admission type |  |  | <0.001 |
| Emergency | 1,574 (68.08%) | 1,602 (73.62%) |  |
| Elective | 738 (31.92%) | 574 (26.38%) |  |
| SOFA | 3.00 (1.00, 5.00) | 7.00 (4.00, 10.00) | <0.001 |
| SAPSII | 33.00 (27.00, 40.00) | 40.00 (32.00, 49.00) | <0.001 |
| APSIII | 40.00 (30.00, 50.00) | 49.00 (36.00, 67.00) | <0.001 |
| Charlson comorbidity index | 7.00 (6.00, 10.00) | 7.00 (6.00, 9.00) | 0.216 |
| Severe liver disease | 110.00 (4.76%) | 95.00 (4.37%) | 0.524 |
| Malignant cancer | 389.00 (16.83%) | 301.00 (13.83%) | 0.006 |
| Renal disease | 702.00 (30.36%) | 678.00 (31.16%) | 0.611 |
| Myocardial infarct | 536.00 (23.18%) | 587.00 (26.98%) | 0.004 |
| Congestive heart failure | 1,211.00 (52.38%) | 1,078.00 (49.54%) | 0.059 |
| Cerebrovascular disease | 386.00 (16.70%) | 318.00 (14.61%) | 0.057 |
| Diabetes | 865.00 (37.41%) | 829.00 (38.10%) | 0.632 |
| Sepsis | 795.00 (34.39%) | 1,351.00 (62.09%) | <0.001 |
| AECOPD | 513.00 (22.19%) | 558.00 (25.64%) | 0.006 |
| Temperature | 36.80 ± 0.27 | 36.88 ± 0.49 | <0.001 |
| Heart rate | 84.25 (73.56, 95.90) | 83.96 (75.05, 96.20) | 0.415 |
| Respiratory rate | 19.84 ± 3.66 | 20.22 ± 3.73 | <0.001 |
| MBP | 78.38 (71.62, 87.00) | 75.24 (70.39, 81.82) | <0.001 |
| SpO2 | 95.60 ± 2.05 | 96.13 ± 3.17 | <0.001 |
| PaO2 | 55.00 (41.00, 84.00) | 99.75 (62.00, 191.00) | <0.001 |
| PaCO2 | 46.00 (38.50, 56.00) | 47.00 (41.00, 56.00) | 0.003 |
| PH | 7.36 ± 0.07 | 7.34 ± 0.08 | <0.001 |
| PaO2/FiO2 | 175.00 (85.25, 268.58) | 190.50 (121.21, 272.00) | 0.326 |
| Glucose | 130.00 (107.50, 166.46) | 135.05 (115.68, 167.90) | <0.001 |
| WBC | 10.15 (7.45, 13.55) | 12.45 (9.20, 16.40) | <0.001 |
| Hemoglobin | 10.15 (8.60, 11.75) | 9.88 (8.55, 11.55) | 0.038 |
| Platelets | 200.50 (149.00, 263.00) | 186.50 (138.00, 251.50) | <0.001 |
| Bicarbonate | 24.39 ± 5.18 | 24.32 ± 5.62 | 0.317 |
| Lactate | 1.60 (1.20, 2.35) | 1.75 (1.30, 2.51) | <0.001 |
| BUN | 21.50 (14.50, 36.50) | 23.00 (15.50, 38.00) | 0.003 |
| Creatinine | 1.00 (0.75, 1.60) | 1.10 (0.75, 1.70) | 0.016 |
| Sodium | 138.50 (135.50, 141.00) | 138.50 (136.00, 141.50) | 0.016 |
| Calcium | 8.60 (8.15, 9.00) | 8.40 (7.95, 8.85) | <0.001 |
| Potassium | 4.25 (3.90, 4.70) | 4.40 (4.00, 4.85) | <0.001 |
| Chloride | 101.00 (97.00, 104.50) | 102.00 (97.50, 105.50) | <0.001 |
| Anion gap | 15.00 (12.50, 17.00) | 14.50 (12.00, 17.00) | <0.001 |
| INR | 1.20 (1.10, 1.50) | 1.30 (1.15, 1.50) | <0.001 |
| PT | 13.25 (11.80, 16.50) | 13.85 (12.30, 16.06) | <0.001 |
| PTT | 30.70 (27.70, 39.09) | 31.30 (27.70, 40.40) | 0.084 |

Table S2: Results of univariate cox regression analysis for covariates

| **Variables** | **HR** | **95%CI** | **P-value** |
| --- | --- | --- | --- |
| Age | 1.03 | 1.02 - 1.04 | < 0.001 |
| Race (black) | 1.09 | 0.79 - 1.50 | 0.618 |
| Race (other) | 1.47 | 1.21 - 1.79 | < 0.001 |
| Gender (female) | 1.19 | 1.00- 1.42 | 0.047 |
| BMI | 1.00 | 0.99 - 1.01 | 0.384 |
| Admission type (elective) | 0.93 | 0.76 - 1.13 | 0.447 |
| SAPSII | 1.05 | 1.04 - 1.05 | < 0.001 |
| Charlson comorbidity index | 1.17 | 1.13 - 1.20 | < 0.001 |
| Severe liver disease | 2.62 | 1.94 - 3.53 | < 0.001 |
| Renal disease | 1.44 | 1.21 - 1.72 | < 0.001 |
| Congestive heart failure | 1.30 | 1.09 - 1.55 | 0.003 |
| Sepsis | 2.07 | 1.69 - 2.53 | < 0.001 |
| WBC | 1.01 | 1.00 - 1.02 | 0.015 |
| Hemoglobin | 0.90 | 0.87 - 0.95 | < 0.001 |
| Creatinine | 1.21 | 1.15 - 1.26 | < 0.001 |
| Sodium | 1.01 | 0.99 - 1.02 | 0.575 |
| Potassium | 1.29 | 1.14 - 1.46 | < 0.001 |
| PT | 1.03 | 1.02 - 1.04 | < 0.001 |
| Glucose | 1.01 | 1.00 - 1.02 | < 0.001 |
| MBP | 0.98 | 0.97 - 0.99 | < 0.001 |
| Lactate | 1.23 | 1.20 - 1.26 | < 0.001 |
| PH | 0.02 | 0.01 - 0.03 | < 0.001 |
| PaO2 | 0.98 | 0.97 - 0.99 | < 0.001 |
| PaCO2 | 1.01 | 1.00 - 1.02 | 0.021 |
| AECOPD | 0.90 | 0.73-1.10 | 0.284 |

Table S3: VIF values for all variables in the regression equation

| Variable | VIF |
| --- | --- |
| ROX index | 1.142015 |
| Age | 1.405646 |
| Race | 1.091578 |
| Gender | 1.086889 |
| BMI | 1.061412 |
| Admission type | 1.032034 |
| SAPSII | 1.740859 |
| Charlson comorbidity index | 1.997390 |
| Severe liver disease | 1.181835 |
| Renal disease | 1.955480 |
| Congestive heart failure | 1.243191 |
| Sepsis | 1.145252 |
| WBC | 1.070362 |
| Hemoglobin | 1.234767 |
| Creatinine | 1.777930 |
| Sodium | 1.096901 |
| Potassium | 1.237742 |
| PT | 1.169025 |
| Glucose | 1.093326 |
| MBP | 1.246946 |
| Lactate | 1.490003 |
| PH | 1.726545 |
| PaO2 | 1.199790 |
| PaCO2 | 1.521033 |
| AECOPD | 1.158241 |

Table S4: COX regression results for mortality outcomes among Quartile 2, Quartile 3, and Quartile 4 groups

| Outcome | Number (Rate) | Univariate analysis | | Multivariate analysis* | |
| --- | --- | --- | --- | --- | --- |
| HR/OR (95%CI) | P-value | HR/OR (95%CI) | P-value |
| 28-day mortality |  |  |  |  |  |
| Quartile 2 | 119.00 (21.88%) | Reference |  | Reference |  |
| Quartile 3 | 103.00 (18.93%) | 0.83 (0.64-1.08) | 0.167 | 0.77 (0.59-1.01) | 0.058 |
| Quartile 4 | 95.00 (17.46%) | 0.76 (0.58-0.99) | 0.049 | 0.74 (0.56-0.98) | 0.035 |
| 3-month mortality |  |  |  |  |  |
| Quartile 2 | 158.00 (29.04%) | Reference |  | Reference |  |
| Quartile 3 | 156.00 (28.68%) | 0.96 (0.77-1.19) | 0.688 | 0.88 (0.70-1.10) | 0.270 |
| Quartile 4 | 142.00 (26.10%) | 0.86 (0.69-1.08) | 0.202 | 0.80 (0.63-1.01) | 0.056 |
| 1-year mortality |  |  |  |  |  |
| Quartile 2 | 222.00 (40.81%) | Reference |  | Reference |  |
| Quartile 3 | 233.00 (42.83%) | 1.03 (0.86-1.24) | 0.728 | 0.98 (0.81-1.18) | 0.853 |
| Quartile 4 | 222.00 (40.81%) | 0.97 (0.80-1.17) | 0.735 | 0.91 (0.75-1.10) | 0.313 |
| In-ICU mortality |  |  |  |  |  |
| Quartile 2 | 88.00 (16.18%) | Reference |  | Reference |  |
| Quartile 3 | 59.00 (10.85%) | 0.59 (0.42-0.82) | 0.002 | 0.64 (0.46-0.91) | 0.012 |
| Quartile 4 | 48.00 (8.82%) | 0.58 (0.41-0.82) | 0.002 | 0.65 (0.45-0.94) | 0.022 |
| In-hospital mortality |  |  |  |  |  |
| Quartile 2 | 115.00 (21.14%) | Reference |  | Reference |  |
| Quartile 3 | 93.00 (17.10%) | 0.74 (0.56-0.98) | 0.032 | 0.67 (0.50-0.88) | 0.005 |
| Quartile 4 | 82.00 (15.07%) | 0.70 (0.52-0.93) | 0.013 | 0.70 (0.52-0.94) | 0.017 |

Quartile 1: ROX index ≤ 7.79; Quartile 2: 7.79 < ROX index ≤9.72; Quartile 3: 9.72 < ROX index ≤ 12.26; Quartile 4: ROX index > 12.26.

"Number (Rate)" refers to death count and percentage.

∗Adjusted variables included age, race, gender, BMI, admission type, SAPSII, Charlson Comorbidity Index, severe liver disease, renal disease, congestive heart failure, sepsis, WBC, hemoglobin, creatinine, sodium, potassium, PT, glucose, MBP, lactate, PH, PaO2, PaCO2 and AECOPD.

Table S5: COX regression results for mortality outcomes among Quartile 3 and Quartile 4 groups.

| Outcome | Number (Rate) | Univariate analysis | | Multivariate analysis* | |
| --- | --- | --- | --- | --- | --- |
| HR/OR/MD (95%CI) | P-value | HR/OR (95%CI) | P-value |
| 28-day mortality |  |  |  |  |  |
| Quartile 3 | 103.00 (18.93%) | Reference |  | Reference |  |
| Quartile 4 | 95.00 (17.46%) | 0.92 (0.69-1.21) | 0.547 | 0.96 (0.72-1.28) | 0.766 |
| 3-month mortality |  |  |  |  |  |
| Quartile 3 | 156.00 (28.68%) | Reference |  | Reference |  |
| Quartile 4 | 142.00 (26.10%) | 0.90 (0.72-1.13) | 0.376 | 0.91 (0.71-1.15) | 0.408 |
| 1-year mortality |  |  |  |  |  |
| Quartile 3 | 233.00 (42.83%) | Reference |  | Reference |  |
| Quartile 4 | 222.00 (40.81%) | 0.94 (0.78-1.13) | 0.485 | 0.92 (0.76-1.12) | 0.415 |
| In-ICU mortality |  |  |  |  |  |
| Quartile 3 | 59.00 (10.85%) | Reference |  | Reference |  |
| Quartile 4 | 48.00 (8.82%) | 0.99 (0.68-1.46) | 0.976 | 1.06 (0.71-1.58) | 0.783 |
| In-hospital mortality |  |  |  |  |  |
| Quartile 3 | 93.00 (17.10%) | Reference |  | Reference |  |
| Quartile 4 | 82.00 (15.07%) | 0.94 (0.70-1.26) | 0.671 | 1.07 (0.78-1.45) | 0.683 |

Quartile 1: ROX index ≤ 7.79; Quartile 2: 7.79 < ROX index ≤9.72; Quartile 3: 9.72 < ROX index ≤ 12.26; Quartile 4: ROX index > 12.26.

"Number (Rate)" refers to death count and percentage.

∗Adjusted variables included age, race, gender, BMI, admission type, SAPSII, Charlson Comorbidity Index, severe liver disease, renal disease, congestive heart failure, sepsis, WBC, hemoglobin, creatinine, sodium, potassium, PT, glucose, MBP, lactate, PH, PaO2, PaCO2 and AECOPD.

Figure S1: Bootstrap analysis of the inflection points for the ROX index.


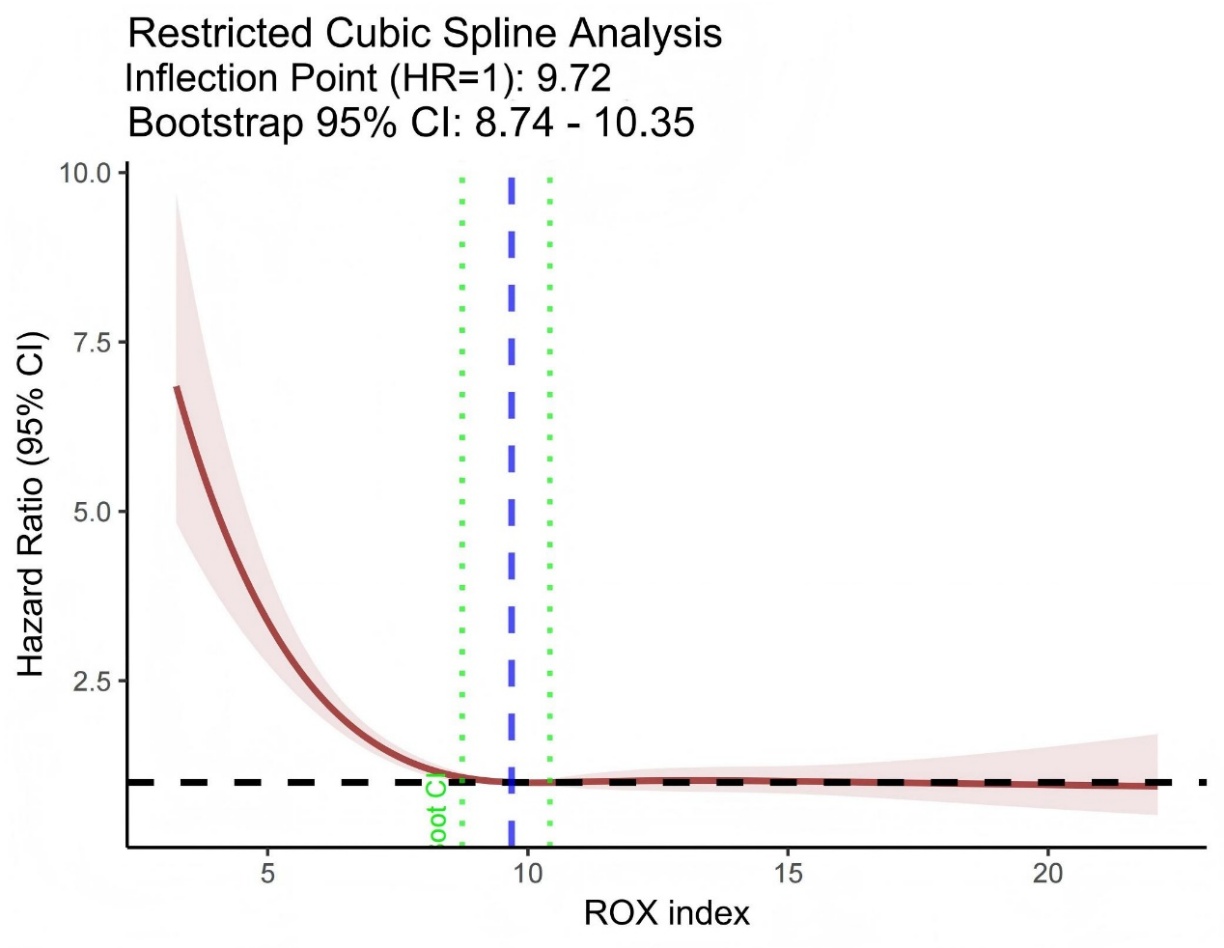


Figure S2: Histogram of the inflection point values for the ROX index derived from bootstrap resamples.


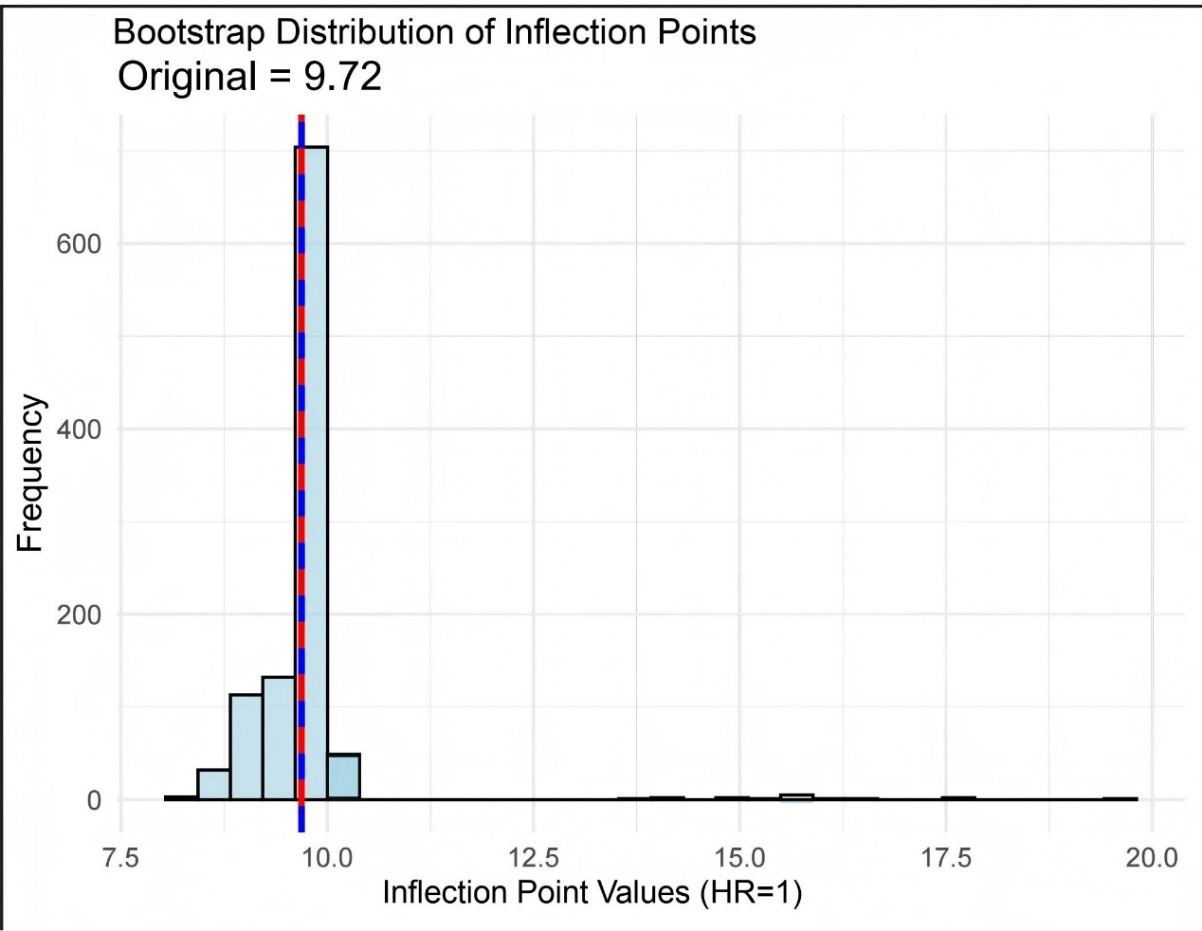

Supplement: Supplementary file 1 [file supplementary%20material.docx]
